# Supplementary material for: Phase-dependent shear-induced order of nanorods in isotropic and nematic wormlike micelle solutions
Source: Royal Society of Chemistry journal article supplement (doi:10.1039/c8nr10440a), 2019-01-01
Supplement: c8nr10440a1.pdf [file c8nr10440a1.pdf]

**Supplementary Information for “Phase-Dependent Shear-Induced Order of Nanorods in Isotropic and Nematic Wormlike Micelle Solutions”**

Ramona Mhanna<sup>1</sup>, Jonghun Lee<sup>2</sup>, Suresh Narayanan<sup>2</sup>, Daniel H. Reich<sup>1</sup>, Robert L. Leheny<sup>1</sup>

<sup>1</sup>Department of Physics & Astronomy, Johns Hopkins University, Baltimore, MD 21218, USA.

<sup>2</sup>X-Ray Science Division, Argonne National Laboratory, Lemont, IL 60439, USA.

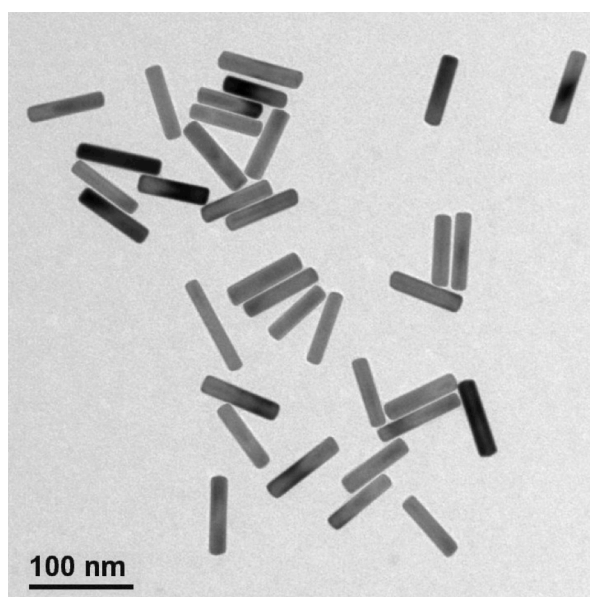

**Figure S1:** Transmission electron microscopy image of Au nanorods used in the experiment. Analysis of this and similar images gives a mean length of the rods of 75.0 nm with a standard deviation of 4.4 nm and a mean radius of 7.5 nm with a standard deviation of 0.8 nm.

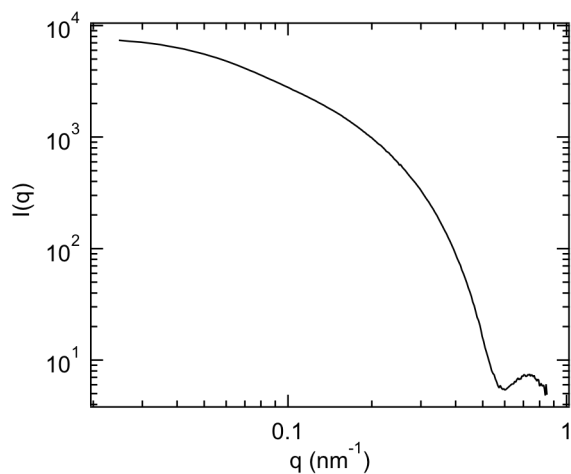

**Figure S2:** X-ray scattering intensity from a dilute aqueous solution of Au nanorods.

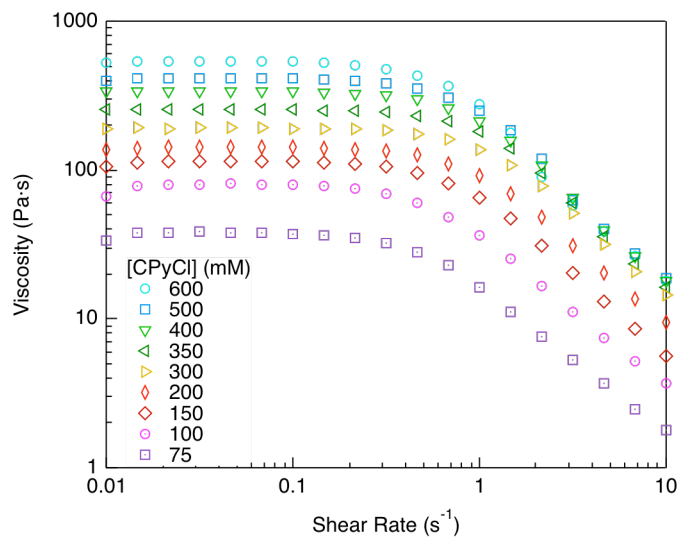

**Figure S3:** Flow curves (viscosity versus shear rate) of a set of CPyCl/NaSal wormlike micelle solutions with CPyCl concentrations specified in the caption. In each case the NaSal concentration is tuned to maximize the solution viscosity, as described in the text.
